# Supplementary material
Source: publisher figshare collection journal article supplement (https://asha.figshare.com/articles/dataset/_/20405856)
Supplement: Supplementary file 3 [file 1]

**Supplemental Material S3.** Administration time and stimuli for word-learning tasks.

| Item                                 | Approximate administration time (subject to individual variation and inclusive of warm-up) |
|--------------------------------------|--------------------------------------------------------------------------------------------|
| Nonword repetition task              | ~5 minutes                                                                                 |
| Fast mapping task                    | ~10 minutes (included 5 min break between referent selection and retention)                |
| Cross-situational word learning task | ~10 – 15 minutes (included 5 min break between training and testing trials)                |

**Stimuli used for nonword repetition task (PSRep Test, Chiat and Roy, 2007)**

All stimuli for this task can be found in the Appendix of Chiat, S., & Roy, P. (2007). The Preschool Repetition Test: An Evaluation of Performance in Typically Developing and Clinically Referred Children. *Journal of Speech, Language, and Hearing Research*, 50(2), 429–443. [https://doi.org/10.1044/1092-4388\(2007/030\)](https://doi.org/10.1044/1092-4388(2007/030))

**Stimuli for fast mapping task**

Familiar objects (all toys, none live)

1. Frog
2. Grapes
3. Tomato
4. Cup
5. Car
6. Spoon
7. Knife
8. Fish

Unfamiliar objects

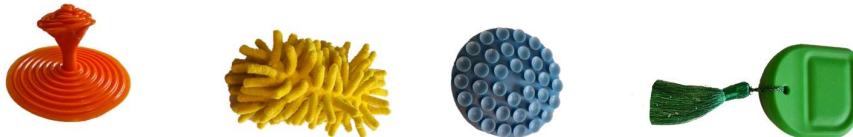

Labels (Horst & Hout, 2016)

1. Dax
2. Wug
3. Yok
4. Lep

## Stimuli used for cross-situational word-learning task

### Stimuli

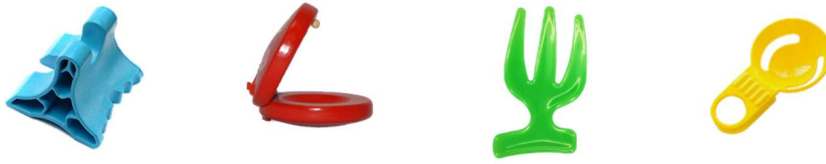

### Labels (Horst & Hout, 2016)

1. Blicket
2. Teebu
3. Fiffin
4. Verdex

## References

- Chiat, S., & Roy, P. (2007). The Preschool Repetition Test: An Evaluation of Performance in Typically Developing and Clinically Referred Children. *Journal of Speech, Language, and Hearing Research*, 50(2), 429–443. [https://doi.org/10.1044/1092-4388\(2007/030\)](https://doi.org/10.1044/1092-4388(2007/030))
- Hartley, C., Bird, L.-A., & Monaghan, P. (2019). Investigating the relationship between fast mapping, retention, and generalisation of words in children with autism spectrum disorder and typical development. *Cognition*, 187, 126–138. <https://doi.org/10.1016/j.cognition.2019.03.001>
- Hartley, C., Bird, L.-A., & Monaghan, P. (2020). Comparing cross-situational word learning, retention, and generalisation in children with autism and typical development. *Cognition*, 200, 104265. <https://doi.org/10.1016/j.cognition.2020.104265>
- Horst, J. S., & Hout, M. C. (2016). The Novel Object and Unusual Name (NOUN) Database: A collection of novel images for use in experimental research. *Behavior Research Methods*, 48(4), 1393–1409. <https://doi.org/10.3758/s13428-015-0647-3>
